# Supplementary material for: CUG-BP1 regulates RyR1 ASI alternative splicing in skeletal muscle atrophy
Source: PubMed Central journal article supplement (PMC4632035; doi:10.1038/srep16083), 2015-11-04
Supplement: srep16083-s1.pdf [file srep16083-s1.pdf]

# **CUG-BP1 regulates RyR1 ASI alternative splicing in skeletal muscle atrophy**

Yinglong Tang<sup>1,3,#</sup>, Huiwen Wang<sup>1,#,\*</sup>, Bin Wei<sup>2,#</sup>, Lei Gu<sup>1,3</sup>, Zhiguang Yang<sup>1,3</sup>, Yuting Guo<sup>3</sup>, Qing Zhang<sup>5</sup>, Yanyun Wu<sup>1</sup>, Qi Yuan<sup>1</sup>, Gang Zhao<sup>4,\*</sup> and Guangju Ji<sup>1,\*</sup>

<sup>1</sup>National Laboratory of Biomacromolecules, Institute of Biophysics, Chinese Academy of Sciences, 15 Datun Road, Beijing 100101, China

<sup>2</sup>Department of Physiology, Wayne State University School of Medicine, Detroit, Michigan 48201

<sup>3</sup>University of the Chinese Academy of Sciences, Beijing 100049, China

<sup>4</sup>Department of Neurology, Xijing Hospital, Forth Military Medical University, Xi'an, Shaanxi 710032, China

<sup>5</sup>Department of Anesthesiology, Beijing Tiantan Hospital, Capital Medical University, Beijing 100050, China

#Contributed equally to this work.

\*To whom correspondence should be addressed to: Guangju Ji (gj28@ibp.ac.cn), Huiwen Wang (whw@moon.ibp.ac.cn), or Gang Zhao (zhaogang@fmmu.edu.cn)

## Supplementary figures

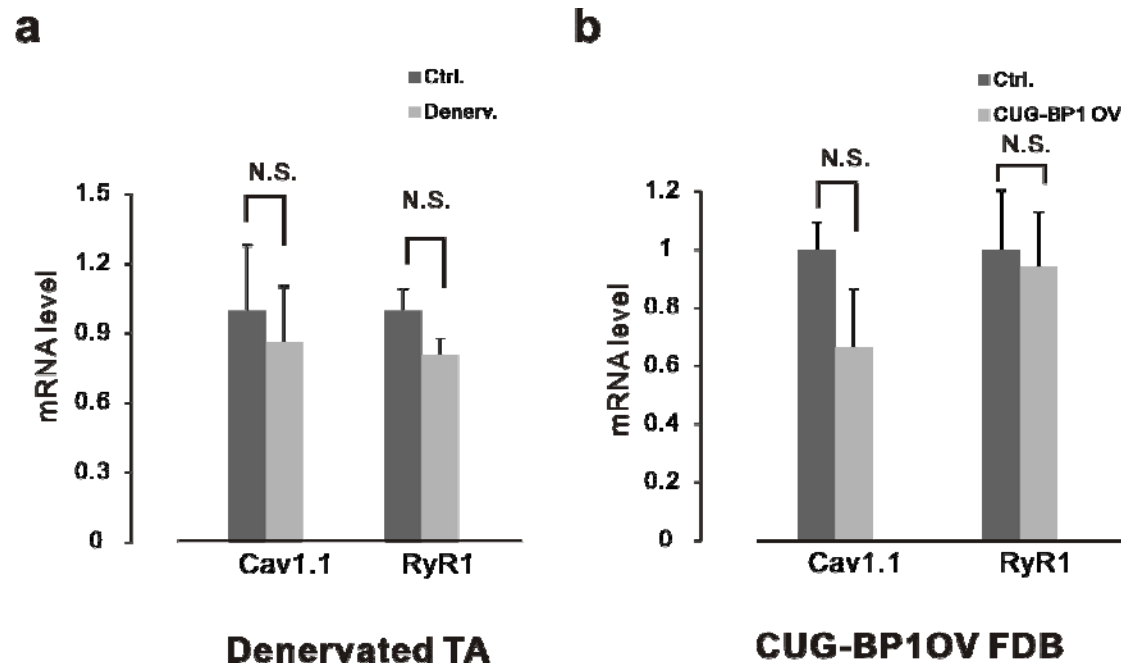

**Figure S1. The mRNA expression level of  $\text{Ca}^{2+}$  release elements in denervation and CUG-BP1 overexpressed FDB muscle.**

Description: The mRNA level of RyR1 and Cav 1.1 were not changed both in the denervation (a) and CUG-BP1 overexpressed (b) FDB muscle by real-time PCR assay.

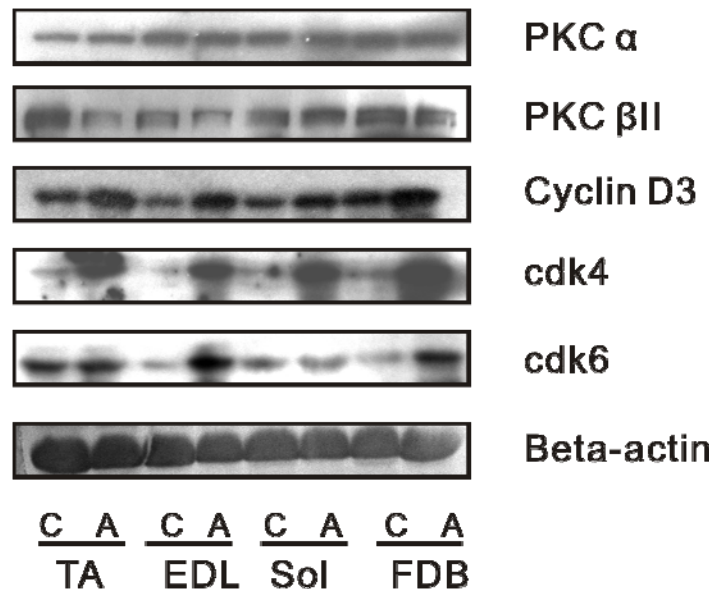

**Figure S2. Cyclin D3/cdk4/6 protein level is increased in denervation-induced muscle atrophy but not PKC.**

Description: representative blots show Cyclin D3 and cdk4/6 protein levels were significantly increased in TA, EDL, soleus and FDB muscles seven days after denervation. Neither PKC  $\alpha$  nor PKC  $\beta$ II protein level was statistically altered in muscles after denervation. All results were repeated for three times.
